# Supplementary material
Source: publisher figshare collection journal article supplement (https://tandf.figshare.com/articles/dataset/_/1404136)
Supplement: Supplementary file 1 [file 2]

Table S1. List of all species and environmental variables correlated significantly with ordination axis modelling spatial structures

| positive correlations            |       |       | negative correlations            |        |       |
|----------------------------------|-------|-------|----------------------------------|--------|-------|
|                                  | Z     | p     |                                  | Z      | p     |
| R scale RDA1                     |       |       |                                  |        |       |
| <i>Deschampsia flexuosa</i>      | 4.997 | 0.000 | <i>Sorbus torminalis</i>         | -4.094 | 0.000 |
| <i>Impatiens parviflora</i>      | 3.857 | 0.000 | <i>Adoxa moschatellina</i>       | -3.670 | 0.000 |
| <i>Corylus avellana</i>          | 3.409 | 0.001 | <i>Vaccinium myrtillus</i>       | -3.548 | 0.000 |
| <i>Brachypodium pinatum</i>      | 3.152 | 0.002 | <i>Lathyrus niger</i>            | -2.738 | 0.006 |
| <i>Galium aparine</i>            | 2.986 | 0.003 | <i>Melittis melissophyllum</i>   | -2.660 | 0.008 |
| <i>Crataegus laevigata</i>       | 2.599 | 0.009 | <i>Festuca rubra</i>             | -2.574 | 0.010 |
| <i>Prunus spinosa</i>            | 2.526 | 0.012 | <i>Veronica officinalis</i>      | -2.355 | 0.019 |
| <i>Galeopsis tetrahit</i>        | 2.201 | 0.028 |                                  |        |       |
| <i>Agrimonia eupatoria</i>       | 1.977 | 0.048 | Ca                               | -2.702 | 0.007 |
|                                  |       |       | pH                               | -2.281 | 0.023 |
|                                  |       |       | Mg                               | -2.258 | 0.024 |
|                                  |       |       | clay                             | -2.008 | 0.045 |
| S scale RDA 1                    |       |       |                                  |        |       |
| <i>Melampyrum pratense</i>       | 5.061 | 0.000 | <i>Vincetoxicum hirundinaria</i> | -3.723 | 0.000 |
| <i>Galium odoratum</i>           | 3.783 | 0.000 | <i>Calystegia sepium</i>         | -3.216 | 0.001 |
| <i>Luzula luzuloides</i>         | 3.541 | 0.000 | <i>Allaria petiolata</i>         | -2.778 | 0.005 |
| <i>Crataegus laevigata</i>       | 3.284 | 0.001 | <i>Calamagrostis arundinacea</i> | -2.757 | 0.006 |
| <i>Melica nutans</i>             | 2.907 | 0.004 | <i>Digitalis grandiflora</i>     | -2.565 | 0.010 |
| <i>Cerasus avium</i>             | 2.643 | 0.008 | <i>Euphorbia cyparissias</i>     | -2.430 | 0.015 |
| <i>Brachypodium pinatum</i>      | 2.558 | 0.011 | <i>Fraxinus excelsior</i>        | -2.361 | 0.018 |
| <i>Corylus avellana</i>          | 2.491 | 0.013 | <i>Lychnis viscaria</i>          | -2.341 | 0.019 |
| <i>Festuca rubra</i>             | 2.358 | 0.018 | <i>Trifolium montanum</i>        | -2.333 | 0.020 |
| <i>Rubus sp.</i>                 | 2.211 | 0.027 | <i>Acer pseudoplatanus</i>       | -2.138 | 0.032 |
| <i>Mentha arvensis</i>           | 2.130 | 0.033 | <i>Polygonatum odoratum</i>      | -1.995 | 0.046 |
| <i>Polygonatum multiflorum</i>   | 2.127 | 0.033 |                                  |        |       |
| <i>Melampyrum nemorosum</i>      | 2.029 | 0.042 | HL                               | -3.030 | 0.002 |
| <i>Luzula multiflora</i>         | 1.984 | 0.047 | sand                             | -2.275 | 0.023 |
| <i>Crataegus monogyna</i>        | 1.977 | 0.048 |                                  |        |       |
| silt                             | 2.182 | 0.029 |                                  |        |       |
| S scale RDA 2                    |       |       |                                  |        |       |
| <i>Hepatica nobilis</i>          | 3.169 | 0.002 | <i>Urtica dioica</i>             | -2.746 | 0.006 |
| <i>Vincetoxicum hirundinaria</i> | 3.123 | 0.002 | <i>Betula pendula</i>            | -2.731 | 0.006 |
| <i>Fagus sylvatica</i>           | 3.088 | 0.002 | <i>Veronica officinalis</i>      | -2.617 | 0.009 |
| <i>Lathyrus niger</i>            | 2.946 | 0.003 | <i>Anemone nemorosa</i>          | -2.520 | 0.012 |
| <i>Fraxinus excelsior</i>        | 2.854 | 0.004 | <i>Quercus petraea</i>           | -2.499 | 0.012 |
| <i>Carpinus betulus</i>          | 2.742 | 0.006 | <i>Crataegus monogyna</i>        | -2.236 | 0.025 |
| <i>Adoxa moschatellina</i>       | 2.587 | 0.010 | <i>Moehringia trinervia</i>      | -2.036 | 0.042 |
| <i>Hedera helix</i>              | 2.439 | 0.015 | <i>Poa nemoralis</i>             | -1.993 | 0.046 |
| <i>Lathyrus vernus</i>           | 2.389 | 0.017 | <i>Scrophularia nodosa</i>       | -1.986 | 0.047 |
| <i>Polygonatum odoratum</i>      | 2.240 | 0.025 |                                  |        |       |
| <i>Galeopsis pubescens</i>       | 2.145 | 0.032 | C:N                              | -3.290 | 0.001 |
| <i>Festuca rubra</i>             | 2.084 | 0.037 |                                  |        |       |
| <i>Melica nutans</i>             | 2.024 | 0.043 |                                  |        |       |
| <i>Acer pseudoplatanus</i>       | 1.976 | 0.048 |                                  |        |       |
| clay                             | 1.997 | 0.046 |                                  |        |       |
