# Supplementary material
Source: publisher figshare collection journal article supplement (https://tandf.figshare.com/articles/dataset/_/1404136)
Supplement: Supplementary file 2 [file 2]

Table S2. Environmental data

| plot nr              | 2             | 8             | 10           | 13           | 14           | 18           | 22           | 37            | 39            | 41            |
|----------------------|---------------|---------------|--------------|--------------|--------------|--------------|--------------|---------------|---------------|---------------|
| mountain range       | Kaczawskie    | Kaczawskie    | Kaczawskie   | Kaczawskie   | Kaczawskie   | Kaczawskie   | Kaczawskie   | Kaczawskie    | Kaczawskie    | Kaczawskie    |
| site                 | Grobla        | Grobla        | Grobla       | Grobla       | Grobla       | Grobla       | Grobla       | Lipa          | Lipa          | Lipa          |
| Dataset              | A             | A             | A            | A            | A            | A            | A            | A             | A             | A             |
| Lat [DD MM SS.SSSS]  | 50 59 25.7691 | 50 59 27.0239 | 50 59 9.9889 | 50 59 8.3443 | 50 59 5.9083 | 50 59 4.0049 | 50 59 9.0314 | 50 58 53.4578 | 50 58 59.7584 | 50 58 52.7697 |
| Long [DD MM SS.SSSS] | 16 5 44.3980  | 16 5 56.6008  | 16 5 51.4903 | 16 5 50.6176 | 16 5 47.1789 | 16 5 59.5328 | 16 6 8.9834  | 16 2 48.9716  | 16 2 46.3565  | 16 2 34.9510  |
| elevation [m a.sl.]  | 341.8         | 347.5         | 361.7        | 357.3        | 331.2        | 317.4        | 362.1        | 355.11        | 386.23        | 398.4         |
| depth [cm]           | 6.3           | 8.0           | 27.3         | 11.3         | 10.3         | 20.3         | 31.7         | 22.0          | 23.0          | 15.0          |
| outcrop [%]          | 10            | 5             | 5            | 0            | 20           | 0            | 0            | 35            | 5             | 5             |
| CF [%]               | 44.0          | 64.6          | 30.4         | 74.2         | 75.6         | 21.6         | 16.6         | 75.4          | 69.0          | 50.4          |
| slope [°]            | 15            | 15            | 10           | 17           | 22           | 30           | 0            | 40            | 5             | 0             |
| HL                   | 0.915         | 0.879         | 0.781        | 0.880        | 0.934        | 0.795        | 0.847        | 0.940         | 0.803         | 0.847         |
| PPFD [%]             | 26.4          | 22.9          | 14.0         | 29.1         | 19.7         | 30.2         | 25.4         | 22.5          | 17.5          | 19.2          |
| pH in KCL            | 3.5           | 3.6           | 3.3          | 3.8          | 3.7          | 3.7          | 3.6          | 3.8           | 3.3           | 3.6           |
| P [mg/100g]          | 2.56          | 4.50          | 2.71         | 7.90         | 1.30         | 0.50         | 0.10         | 1.20          | 1.96          | 2.97          |
| K [mg/100g]          | 28.5          | 29.0          | 15.5         | 19.7         | 21.0         | 8.0          | 7.2          | 22.9          | 12.0          | 28.5          |
| Mg [mg/100g]         | 23.2          | 17.8          | 6.2          | 22.5         | 23.5         | 6.1          | 2.4          | 31.0          | 5.9           | 18.3          |
| Ca [mg/dm3]          | 100.0         | 197.0         | 140.0        | 358.0        | 239.0        | 167.0        | 11.0         | 219.0         | 72.0          | 284.0         |
| N [%]                | 0.88          | 0.53          | 0.13         | 0.45         | 0.45         | 0.18         | 0.19         | 0.60          | 0.41          | 0.60          |
| C [%]                | 16.1          | 10.3          | 7.6          | 8.7          | 6.9          | 3.6          | 4.1          | 9.7           | 8.8           | 13.2          |
| sand [%]             | 75.0          | 57.0          | 31.0         | 69.0         | 66.0         | 33.0         | 32.0         | 61.0          | 35.0          | 64.0          |
| silt [%]             | 23.0          | 40.0          | 64.0         | 29.0         | 31.0         | 62.0         | 63.0         | 36.0          | 59.0          | 33.0          |
| clay [%]             | 2.0           | 3.0           | 5.0          | 2.0          | 3.0          | 5.0          | 5.0          | 3.0           | 6.0           | 3.0           |
| WHC                  | 353           | 284           | 1901         | 292          | 252          | 1592         | 2644         | 542           | 712           | 744           |
| moisture [%]         | 8.1           | 9.5           | 11.8         | 8.2          | 5.6          | 8.2          | 13.3         | 8.5           | 9.0           | 6.6           |

| plot nr              | 42            | 44            | 48            | 49            | 53            | 58            | 59            | 61            | 62            | 63            |
|----------------------|---------------|---------------|---------------|---------------|---------------|---------------|---------------|---------------|---------------|---------------|
| mountain range       | Kaczawskie    | Kaczawskie    | Kaczawskie    | Kaczawskie    | Wałbrzyskie   | Wałbrzyskie   | Wałbrzyskie   | Wałbrzyskie   | Wałbrzyskie   | Wałbrzyskie   |
| site                 | Lipa          | Lipa          | Lipa          | Lipa          | Cieszów       | Cieszów       | Cieszów       | Cieszów       | Cieszów       | Cieszów       |
| Dataset              | A             | A             | A             | A             | A             | A             | A             | A             | A             | A             |
| Lat [DD MM SS.SSSS]  | 50 58 55.7593 | 50 58 58.4394 | 50 58 58.8333 | 50 58 52.5110 | 50 52 20.1426 | 50 52 24.5625 | 50 52 24.1873 | 50 52 14.4755 | 50 52 13.7971 | 50 52 14.9047 |
| Long [DD MM SS.SSSS] | 16 2 18.3220  | 16 2 13.4607  | 16 2 18.7195  | 16 2 18.1116  | 16 14 36.9096 | 16 14 37.9573 | 16 14 35.3741 | 16 14 41.7274 | 16 14 43.0774 | 16 14 44.7618 |
| elevation [m a.sl.]  | 366.03        | 394.71        | 353.34        | 389.32        | 368.7         | 402.7         | 384           | 353.6         | 354.5         | 384.5         |
| depth [cm]           | 25.0          | 30.7          | 24.0          | 25.3          | 13.8          | 11.8          | 7.7           | 12.0          | 13.7          | 7.3           |
| outcrop [%]          | 0             | 0             | 15            | 5             | 0             | 0             | 0             | 0             | 0             | 0             |
| CF [%]               | 49.7          | 22.3          | 73.3          | 42.0          | 54.3          | 49.1          | 56.0          | 66.7          | 71.1          | 56.0          |
| slope [°]            | 20            | 0             | 30            | 15            | 27            | 12            | 35            | 28            | 30            | 22            |
| HL                   | 0.917         | 0.847         | 0.944         | 0.879         | 0.934         | 0.896         | 0.944         | 0.935         | 0.936         | 0.917         |
| PPFD [%]             | 27.7          | 15.7          | 27.5          | 21.7          | 26.7          | 21.7          | 19.1          | 21.8          | 16.3          | 29.7          |
| pH in KCL            | 3.7           | 3.9           | 3.7           | 3.9           | 3.6           | 3.8           | 3.8           | 3.7           | 3.0           | 3.7           |
| P [mg/100g]          | 0.40          | 2.30          | 0.60          | 1.30          | 0.50          | 1.89          | 1.70          | 1.70          | 1.75          | 10.10         |
| K [mg/100g]          | 8.1           | 21.5          | 10.5          | 22.4          | 13.8          | 18.5          | 21.2          | 13.5          | 10.0          | 35.2          |
| Mg [mg/100g]         | 8.5           | 20.5          | 9.6           | 24.0          | 10.2          | 29.2          | 18.7          | 10.7          | 1.5           | 12.8          |
| Ca [mg/dm3]          | 140.0         | 301.0         | 113.0         | 284.0         | 180.0         | 360.0         | 256.0         | 190.0         | 157.0         | 204.0         |
| N [%]                | 0.17          | 0.62          | 0.17          | 0.51          | 0.36          | 0.40          | 0.52          | 0.38          | 0.30          | 0.58          |
| C [%]                | 2.9           | 10.1          | 2.5           | 8.7           | 6.1           | 7.5           | 8.6           | 5.7           | 4.8           | 8.6           |
| sand [%]             | 38.0          | 54.0          | 41.0          | 61.0          | 56.0          | 48.0          | 62.0          | 51.0          | 42.0          | 60.0          |
| silt [%]             | 57.0          | 41.0          | 53.0          | 35.0          | 39.0          | 48.0          | 35.0          | 46.0          | 55.0          | 36.0          |
| clay [%]             | 6.0           | 4.0           | 5.0           | 4.0           | 6.0           | 4.0           | 3.0           | 4.0           | 3.0           | 4.0           |
| WHC                  | 1256          | 2385          | 640           | 1469          | 632           | 602           | 337           | 400           | 395           | 323           |
| moisture [%]         | 6.8           | 9.0           | 11.6          | 7.9           | 9.2           | 11.4          | 8.8           | 7.3           | 6.2           | 6.4           |

|                      |               |               |               |               |               |               |               |               |               |               |
|----------------------|---------------|---------------|---------------|---------------|---------------|---------------|---------------|---------------|---------------|---------------|
| plot nr              | 67            | 74            | 75            | 76            | 77            | 78            | 79            | 80            | 81            | 82            |
| mountain range       | Wałbrzyskie   |
| site                 | Cieszów       | Chwaliszów    | Grabnik       | Grabnik       |
| Dataset              | A             | A             | A             | A             | A             | A             | A             | A             | A             | A             |
| Lat [DD MM SS.SSSS]  | 50 52 12.8780 | 50 52 44.8277 | 50 52 46.1710 | 50 52 46.4902 | 50 52 47.5227 | 50 52 43.4794 | 50 52 44.5387 | 50 52 45.5855 | 50 52 7.4395  | 50 52 6.6176  |
| Long [DD MM SS.SSSS] | 16 14 46.0150 | 16 14 3.7559  | 16 14 2.8231  | 16 14 4.9736  | 16 14 7.6735  | 16 14 5.8885  | 16 14 7.8732  | 16 14 9.8868  | 16 16 47.7908 | 16 16 50.1352 |
| elevation [m a.sl.]  | 363.9         | 328.7         | 334.6         | 351.9         | 365.8         | 324.4         | 350.8         | 369.1         | 411.7         | 399.2         |
| depth [cm]           | 13.7          | 15.3          | 18.7          | 12.3          | 22.0          | 28.0          | 11.3          | 10.3          | 11.0          | 16.0          |
| outcrop [%]          | 0             | 0             | 10            | 0             | 0             | 0             | 0             | 0             | 0             | 0             |
| CF [%]               | 34.3          | 59.0          | 55.9          | 63.2          | 52.3          | 38.0          | 64.1          | 55.5          | 47.9          | 57.2          |
| slope [°]            | 27            | 25            | 15            | 24            | 5             | 32            | 27            | 13            | 10            | 15            |
| HL                   | 0.942         | 0.938         | 0.911         | 0.938         | 0.873         | 0.945         | 0.934         | 0.877         | 0.872         | 0.823         |
| PPFD [%]             | 21.9          | 24.4          | 26.4          | 28.6          | 24.5          | 20.8          | 17.9          | 26.5          | 21.6          | 24.6          |
| pH in KCL            | 3.3           | 2.9           | 3.5           | 3.3           | 3.5           | 3.4           | 3.3           | 3.5           | 3.5           | 3.7           |
| P [mg/100g]          | 1.61          | 1.31          | 0.90          | 2.11          | 0.50          | 0.70          | 0.10          | 0.80          | 0.38          | 2.06          |
| K [mg/100g]          | 9.0           | 10.5          | 20.0          | 13.0          | 14.8          | 19.5          | 13.5          | 16.1          | 7.5           | 23.5          |
| Mg [mg/100g]         | 5.5           | 0.3           | 9.0           | 8.6           | 7.8           | 9.5           | 1.9           | 6.7           | 2.9           | 12.1          |
| Ca [mg/dm3]          | 140.0         | 25.0          | 108.0         | 127.0         | 148.0         | 79.0          | 125.0         | 148.0         | 78.0          | 241.0         |
| N [%]                | 0.22          | 0.26          | 0.33          | 0.34          | 0.32          | 0.55          | 0.34          | 0.29          | 0.25          | 0.46          |
| C [%]                | 4.2           | 6.2           | 7.4           | 10.9          | 4.8           | 9.2           | 18.1          | 5.3           | 9.4           | 11.6          |
| sand [%]             | 37.0          | 60.0          | 70.0          | 68.0          | 54.0          | 57.0          | 49.0          | 47.0          | 40.0          | 48.0          |
| silt [%]             | 58.0          | 37.0          | 28.0          | 30.0          | 41.0          | 41.0          | 47.0          | 48.0          | 56.0          | 47.0          |
| clay [%]             | 5.0           | 3.0           | 2.0           | 2.0           | 5.0           | 3.0           | 4.0           | 5.0           | 4.0           | 5.0           |
| WHC                  | 898           | 629           | 823           | 454           | 1049          | 1736          | 407           | 460           | 573           | 685           |
| moisture [%]         | 9.9           | 8.4           | 6.1           | 8.0           | 10.3          | 10.2          | 7.4           | 10.8          | 8.6           | 8.3           |

|                      |               |               |               |               |               |              |              |              |              |              |
|----------------------|---------------|---------------|---------------|---------------|---------------|--------------|--------------|--------------|--------------|--------------|
| plot nr              | 83            | 84            | 85            | 86            | 87            | 89           | 91           | 92           | 93           | 94           |
| mountain range       | Wałbrzyskie   | Wałbrzyskie   | Wałbrzyskie   | Wałbrzyskie   | Wałbrzyskie   | Kaczawskie   | Kaczawskie   | Kaczawskie   | Kaczawskie   | Kaczawskie   |
| site                 | Grabnik       | Grabnik       | Grabnik       | Grabnik       | Grabnik       | Paszowice    | Paszowice    | Paszowice    | Paszowice    | Paszowice    |
| Dataset              | A             | A             | A             | A             | A             | A            | A            | A            | A            | A            |
| Lat [DD MM SS.SSSS]  | 50 52 6.2857  | 50 52 4.4312  | 50 52 5.5028  | 50 52 6.4893  | 50 52 8.0008  | 51 0 28.8080 | 51 0 26.6643 | 51 0 25.1923 | 51 0 38.8573 | 51 0 42.4291 |
| Long [DD MM SS.SSSS] | 16 16 52.8258 | 16 16 49.9625 | 16 16 48.2884 | 16 16 46.4213 | 16 16 43.8030 | 16 8 9.0755  | 16 8 10.1520 | 16 8 7.9049  | 16 7 59.5974 | 16 8 0.0868  |
| elevation [m a.sl.]  | 382.4         | 379.4         | 395.3         | 406.3         | 420.8         | 304.2        | 297.8        | 281.4        | 341.9        | 358.2        |
| depth [cm]           | 15.2          | 18.7          | 16.3          | 10.7          | 13.3          | 18.0         | 6.0          | 11.3         | 16.0         | 7.5          |
| outcrop [%]          | 0             | 0             | 0             | 0             | 0             | 0            | 0            | 0            | 0            | 0            |
| CF [%]               | 46.0          | 37.5          | 32.2          | 56.8          | 62.9          | 43.7         | 46.2         | 56.5         | 14.4         | 47.0         |
| slope [°]            | 21            | 18            | 17            | 15            | 10            | 0            | 15           | 30           | 6            | 6            |
| HL                   | 0.714         | 0.814         | 0.880         | 0.862         | 0.861         | 0.847        | 0.893        | 0.841        | 0.870        | 0.864        |
| PPFD [%]             | 21.0          | 21.4          | 23.0          | 27.2          | 21.5          | 12.6         | 19.4         | 16.7         | 20.5         | 21.1         |
| pH in KCL            | 3.6           | 3.5           | 3.5           | 3.7           | 3.7           | 3.9          | 3.6          | 3.9          | 3.2          | 3.5          |
| P [mg/100g]          | 0.40          | 0.50          | 0.50          | 1.79          | 1.00          | 0.50         | 0.01         | 0.50         | 1.52         | 3.08         |
| K [mg/100g]          | 9.8           | 9.6           | 8.8           | 19.0          | 16.2          | 10.5         | 27.0         | 23.5         | 4.5          | 26.5         |
| Mg [mg/100g]         | 6.9           | 7.6           | 5.1           | 18.0          | 17.7          | 11.4         | 8.2          | 11.2         | 2.8          | 19.1         |
| Ca [mg/dm3]          | 118.0         | 88.0          | 28.0          | 178.0         | 259.0         | 492.0        | 169.0        | 388.0        | 140.0        | 152.0        |
| N [%]                | 0.23          | 0.27          | 0.25          | 0.40          | 0.39          | 0.20         | 0.30         | 0.16         | 0.43         | 0.70         |
| C [%]                | 4.1           | 5.3           | 4.8           | 8.0           | 5.4           | 3.5          | 13.8         | 2.5          | 2.7          | 9.0          |
| sand [%]             | 42.0          | 41.0          | 32.0          | 69.0          | 54.0          | 29.0         | 45.0         | 37.0         | 21.0         | 41.0         |
| silt [%]             | 53.0          | 54.0          | 61.0          | 28.0          | 41.0          | 64.0         | 48.0         | 55.0         | 72.0         | 56.0         |
| clay [%]             | 5.0           | 5.0           | 7.0           | 3.0           | 5.0           | 7.0          | 7.0          | 8.0          | 7.0          | 3.0          |
| WHC                  | 819           | 1167          | 1108          | 461           | 495           | 1013         | 323          | 493          | 1370         | 398          |
| moisture [%]         | 8.2           | 9.9           | 11.4          | 8.6           | 10.2          | 17.3         | 9.3          | 17.2         | 14.6         | 8.9          |

|                      |              |              |               |               |               |               |               |               |               |
|----------------------|--------------|--------------|---------------|---------------|---------------|---------------|---------------|---------------|---------------|
| plot nr              | 95           | 106          | 108           | 109           | 110           | 111           | 113           | 114           | 116           |
| mountain range       | Kaczawskie   | Kaczawskie   | Wałbrzyskie   |
| site                 | Paszowice    | Paszowice    | Czyżynka      |
| Dataset              | A            | A            | A             | A             | A             | A             | A             | A             | A             |
| Lat [DD MM SS.SSSS]  | 51 0 45.4921 | 51 0 25.0442 | 50 51 25.3601 | 50 51 26.8078 | 50 51 28.4890 | 50 51 26.7791 | 50 51 29.7005 | 50 51 30.9596 | 50 51 27.5612 |
| Long [DD MM SS.SSSS] | 16 8 0.3895  | 16 8 3.7620  | 16 15 0.6053  | 16 15 0.7669  | 16 15 1.3063  | 16 14 50.5639 | 16 14 53.4420 | 16 14 53.3342 | 16 14 56.1724 |
| elevation [m a.sl.]  | 366.2        | 292.6        | 361.5         | 380.5         | 401.2         | 347.1         | 398.1         | 414.1         | 387.6         |
| depth [cm]           | 9.3          | 7.5          | 19.0          | 14.3          | 15.0          | 14.0          | 10.3          | 8.7           | 11.7          |
| outcrop [%]          | 0            | 0            | 0             | 0             | 0             | 10            | 0             | 0             | 10            |
| CF [%]               | 25.4         | 58.7         | 44.3          | 39.7          | 36.9          | 49.2          | 50.2          | 51.0          | 60.0          |
| slope [°]            | 3            | 28           | 25            | 25            | 15            | 20            | 20            | 11            | 33            |
| HL                   | 0.857        | 0.902        | 0.866         | 0.880         | 0.843         | 0.927         | 0.834         | 0.874         | 0.929         |
| PPFD [%]             | 22.4         | 19.7         | 18.2          | 17.3          | 20.3          | 19.0          | 25.1          | 16.5          | 26.2          |
| pH in KCL            | 3.9          | 3.6          | 3.5           | 3.3           | 3.5           | 3.8           | 3.2           | 3.3           | 3.3           |
| P [mg/100g]          | 3.40         | 0.50         | 0.27          | 0.59          | 0.63          | 1.71          | 1.07          | 2.24          | 0.12          |
| K [mg/100g]          | 18.0         | 18.2         | 8.0           | 9.0           | 14.0          | 25.5          | 19.0          | 16.0          | 7.5           |
| Mg [mg/100g]         | 16.0         | 12.3         | 1.3           | 1.8           | 2.9           | 8.2           | 2.3           | 4.3           | 3.0           |
| Ca [mg/dm3]          | 182.0        | 329.0        | 60.0          | 82.0          | 120.0         | 214.0         | 73.0          | 138.0         | 24.0          |
| N [%]                | 0.48         | 0.21         | 0.17          | 0.30          | 0.32          | 0.10          | 0.72          | 0.43          | 0.20          |
| C [%]                | 7.2          | 3.7          | 4.1           | 20.6          | 15.2          | 12.2          | 31.3          | 26.3          | 7.0           |
| sand [%]             | 46.0         | 51.0         | 32.0          | 52.0          | 54.0          | 48.0          | 69.0          | 70.0          | 48.0          |
| silt [%]             | 50.0         | 43.0         | 64.0          | 45.0          | 43.0          | 49.0          | 29.0          | 28.0          | 48.0          |
| clay [%]             | 4.0          | 6.0          | 4.0           | 3.0           | 3.0           | 3.0           | 2.0           | 2.0           | 4.0           |
| WHC                  | 696          | 310          | 1058          | 864           | 947           | 711           | 514           | 425           | 467           |
| moisture [%]         | 11.6         | 10.2         | 11.2          | 10.7          | 9.8           | 13.7          | 9.3           | 7.2           | 6.3           |

| plot nr              | 6             | 12            | 16           | 21            | 26            | 27            | 35            | 45            | 46            |
|----------------------|---------------|---------------|--------------|---------------|---------------|---------------|---------------|---------------|---------------|
| mountain range       | Kaczawskie    | Kaczawskie    | Kaczawskie   | Kaczawskie    | Kaczawskie    | Kaczawskie    | Kaczawskie    | Kaczawskie    | Kaczawskie    |
| site                 | Grobla        | Grobla        | Grobla       | Grobla        | Grobla        | Lipa          | Lipa          | Lipa          | Lipa          |
| Dataset              | B             | B             | B            | B             | B             | B             | B             | B             | B             |
| Lat [DD MM SS.SSSS]  | 50 59 22.1731 | 50 59 10.0463 | 50 59 3.5616 | 50 59 12.1555 | 50 58 59.0139 | 50 58 48.6645 | 50 58 47.1575 | 50 58 51.3103 | 50 58 55.0339 |
| Long [DD MM SS.SSSS] | 16 5 47.1941  | 16 5 41.4234  | 16 5 52.9553 | 16 6 7.4588   | 16 6 20.8227  | 16 3 7.0253   | 16 2 51.5658  | 16 3 3.1151   | 16 2 56.2121  |
| elevation [m a.sl.]  | 324.6         | 303.7         | 318.7        | 378.8         | 307.5         | 344.4         | 369.12        | 358.41        | 394.64        |
| depth [cm]           | 13.7          | 23.0          | 24.3         | 16.7          | 22.7          | 31.7          | 34.0          | 15.3          | 21.7          |
| outcrop [%]          | 10            | 10            | 5            | 0             | 5             | 0             | 0             | 20            | 0             |
| CF [%]               | 35.3          | 16.4          | 34.6         | 21.4          | 17.4          | 9.8           | 70.0          | 65.2          | 50.5          |
| slope [°]            | 20            | 25            | 16           | 0             | 20            | 5             | 5             | 35            | 10            |
| HL                   | 0.881         | 0.922         | 0.880        | 0.847         | 0.881         | 0.803         | 0.874         | 0.864         | 0.872         |
| PPFD [%]             | 24.1          | 23.3          | 22.0         | 22.3          | 35.2          | 17.9          | 22.3          | 20.3          | 24.9          |
| pH in KCL            | 3.6           | 3.8           | 3.6          | 3.5           | 3.5           | 3.5           | 3.8           | 3.8           | 3.9           |
| P [mg/100g]          | 0.60          | 0.80          | 3.80         | 5.90          | 0.30          | 0.40          | 0.60          | 0.40          | 0.80          |
| K [mg/100g]          | 9.0           | 10.1          | 16.0         | 12.3          | 6.4           | 8.2           | 16.4          | 14.5          | 20.1          |
| Mg [mg/100g]         | 9.2           | 16.9          | 9.3          | 9.4           | 2.2           | 10.5          | 26.0          | 10.1          | 17.6          |
| Ca [mg/dm3]          | 133.0         | 252.0         | 142.0        | 126.0         | 28.0          | 73.0          | 212.0         | 174.0         | 245.0         |
| N [%]                | 0.18          | 0.24          | 0.38         | 0.34          | 0.15          | 0.27          | 0.42          | 0.29          | 0.50          |
| C [%]                | 4.8           | 5.3           | 7.4          | 5.8           | 3.4           | 4.5           | 5.6           | 4.5           | 7.8           |
| sand [%]             | 37.0          | 40.0          | 46.0         | 35.0          | 32.0          | 32.0          | 46.0          | 39.0          | 45.0          |
| silt [%]             | 57.0          | 56.0          | 48.0         | 61.0          | 62.0          | 63.0          | 50.0          | 55.0          | 51.0          |
| clay [%]             | 6.0           | 4.0           | 6.0          | 5.0           | 6.0           | 6.0           | 4.0           | 6.0           | 5.0           |
| WHC                  | 886           | 1923          | 1589         | 1313          | 1875          | 2855          | 1020          | 533           | 1073          |
| moisture [%]         | 7.3           | 11.7          | 10.2         | 10.6          | 11.7          | 17.5          | 4.9           | 8.4           | 9.0           |

| plot nr              | 52            | 57            | 66            | 71            | 72            |
|----------------------|---------------|---------------|---------------|---------------|---------------|
| mountain range       | Wałbrzyskie   | Wałbrzyskie   | Wałbrzyskie   | Wałbrzyskie   | Wałbrzyskie   |
| site                 | Cieszów       | Cieszów       | Cieszów       | Cieszów       | Cieszów       |
| Dataset              | B             | B             | B             | B             | B             |
| Lat [DD MM SS.SSSS]  | 50 52 19.6148 | 50 52 21.2355 | 50 52 13.6015 | 50 52 12.5216 | 50 52 11.7077 |
| Long [DD MM SS.SSSS] | 16 14 33.4286 | 16 14 38.6000 | 16 14 47.6077 | 16 14 54.7728 | 16 14 52.5899 |
| elevation [m a.sl.]  | 339.8         | 386.9         | 382.3         | 410.9         | 398.3         |
| depth [cm]           | 16.5          | 14.2          | 12.3          | 12.7          | 11.7          |
| outcrop [%]          | 0             | 0             | 0             | 0             | 0             |
| CF [%]               | 49.8          | 34.1          | 30.5          | 53.8          | 48.4          |
| slope [°]            | 31            | 20            | 25            | 10            | 22            |
| HL                   | 0.944         | 0.924         | 0.938         | 0.872         | 0.933         |
| PPFD [%]             | 24.3          | 26.0          | 20.1          | 23.0          | 22.7          |
| pH in KCL            | 3.6           | 4.3           | 3.2           | 3.6           | 3.6           |
| P [mg/100g]          | 1.40          | 7.50          | 1.33          | 1.60          | 1.40          |
| K [mg/100g]          | 18.6          | 34.3          | 8.5           | 11.2          | 18.6          |
| Mg [mg/100g]         | 7.5           | 24.0          | 1.0           | 9.3           | 17.6          |
| Ca [mg/dm3]          | 157.0         | 387.0         | 97.0          | 225.0         | 198.0         |
| N [%]                | 0.28          | 0.86          | 0.24          | 0.36          | 0.44          |
| C [%]                | 3.9           | 10.5          | 3.4           | 4.5           | 7.1           |
| sand [%]             | 49.0          | 74.0          | 48.0          | 41.0          | 64.0          |
| silt [%]             | 45.0          | 24.0          | 48.0          | 54.0          | 33.0          |
| clay [%]             | 6.0           | 1.0           | 4.0           | 5.0           | 3.0           |
| WHC                  | 828           | 936           | 857           | 585           | 602           |
| moisture [%]         | 7.9           | 8.4           | 8.4           | 8.9           | 9.1           |
